# Supplementary material for: Complete paternally inherited mitogenomes of two freshwater mussels Unio pictorum and Sinanodonta woodiana (Bivalvia: Unionidae)
Source: PeerJ journal article supplement (doi:10.7717/peerj.5573), 2018-09-11
Supplement: primers.pdf [file primers.pdf]

Supplementary Table S1: Primers used in PCR and sequencing of *U. pictorum* (U) and *S. woodiana* (A) M-type mitogenomes.

| Name        | Sequence                         | Specificity |
|-------------|----------------------------------|-------------|
| AA106_R15   | TTCGTGGATTATCGAATTAAG            | A           |
| M.aa.02     | TCTTTGGGTCCTTTCGTACAA            | UA          |
| M.aa.06     | GATGAACTATTTATCCGCCTTT           | A           |
| M.at8.01    | TTAAATGCCTCAATTAAGTCCT           | A           |
| M.aw.01     | TTATGAGCCCACTAGCTTATTTT          | A           |
| M.aw.01a    | GCAAAAGGAGGTATTCC                | A           |
| M.aw.01b    | TTAAGGTGTAAATAGCGAAGTAAAATAA     | A           |
| M.aw.02     | AAACAGGTATAAAAGAGTGATTAACCC      | A           |
| M.aw.02a    | AAGAGTGATTAACCCCG                | A           |
| M.aw.03     | GGTTTGATAGCAAATGAACAGCTATATTATTC | A           |
| M.aw.03a    | AACAGGCGGTAGTAAATGAGGTG          | A           |
| M.aw.03b    | GCGGTAGTAAATGAGGTGAATGTG         | A           |
| M.aw.04a    | TTTCCTACTTCTTACATGATTGGGTC       | A           |
| M.aw.04b    | GGGTCAAATACCAAGAGAAACTCC         | A           |
| M.aw.05     | CTCCTAGTATTTCTATTCAACCCGC        | A           |
| M.aw.06     | GATGGACTATTTATCCGCCTTTG          | A           |
| M.aw.07     | TTCATTTAGCAAGTGTTTCATCAA         | A           |
| M.aw.08     | CGAATGACATGACTCTACCCAA           | A           |
| M.aw.1d     | ATAGCATGATCGTATAGGCATTG          | A           |
| M.aw.1e     | TGTTAATTGACTGTAGGGAGTTACC        | A           |
| M.aw.LR.102 | TCCTTTGTTTGTGGATCTGTTTTGTG       | A           |
| M.aw.LR.202 | GCAGGCAGTCAAACAGAAAAAGGTA        | A           |
| M.aw.Z1     | CCAATGGATTATTTTGTCTACAGC         | A           |
| M.aw.Z2     | TGTAGGTAGAGTAAACGATTATGGTTC      | A           |
| M.co2.01    | TATCGTATATTGGAGGTAGATAATCG       | A           |
| M.co2.02    | ATTTGACCTCAAAGCTCATCTT           | U           |
| M.co3.01    | TAAATGCGTAGTCCTTTTCATTT          | U           |
| M.co3.04    | TGGAGTTAGTGTTACTTGTATGTCA        | U           |
| M.co3.05    | ACTTGTGTGTGTATTGATGAGGTGG        | A           |
| M.co3.06    | TGTATTGATGAGGAGGGAGG             | U           |
| M.for.02    | AACAGCACGAAACAAACCA              | U           |
| M.for.04    | GGGTGGTTATAGAGGATGGTAA           | A           |

|             |                                      |    |
|-------------|--------------------------------------|----|
| M.glu.01    | TACACTAAGCTAACAGTGCTGAGAA            | U  |
| M.lrn.01    | AGCRAAATACCTATCGAGCCACTTG            | U  |
| M.lrn.02    | CCTTAGAGCCCCTAGAAATAGC               | U  |
| M.nd1.03    | GGTTAGGATTATTGGAATTTTCG              | U  |
| M.nd4.01    | ATATACAAAACCACTTCACCACAA             | U  |
| M.nd4.02    | TGGAAACCTAAGTCTCCTACAAACG            | A  |
| M.nd4.04    | CACCATAACTACAATTACCAATCC             | U  |
| M.nd4.06    | AAGAAATAAACCTTATACAACCTAAAA          | A  |
| M.nd4.09    | ACCGAGGCTTCAACATGAG                  | A  |
| M.nd5.04    | GTGAATGGAGATACTGGGTGG                | U  |
| M.nd5.05    | TATACATAACTAATACTAGCCCTCAATAAA       | U  |
| M.nd5.06    | ATACAATACCCAACAAATCCCA               | U  |
| M.nd6.02    | AACTATAAAAATTATATAGGCATATCATGT       | U  |
| M.srn.01    | ACCGCCACGTTCTTTAAGTTTGG              | UA |
| M.up.01     | TATGAGCCCCTAGCTTGGTT                 | U  |
| M.up.01b    | TGTGAATCTTAGTGGTTTTGAGTAG            | U  |
| M.up.02     | AAATAGGCATAAAAGAGTGATTAATTCCGCATAACT | U  |
| M.up.02b    | GCTTCAACACAAATAGGCATAA               | U  |
| M.up.03     | GGGATTTTATGCAATGAGCAGCTTTACTATTC     | U  |
| M.up.LR.101 | CGTATGACTTTATTTGTATGATCTGTTTTGTG     | U  |
| M.ut.01     | TTATGAGCCCCTAGCTTAGTTT               | A  |
| M.ut.02c    | CATGGAAGAATGGTTCAAACA                | U  |
| M.ut.03b    | TGAGGATTAGTGGGTTTGTCTTTAAG           | U  |
| M.ut.03c    | TTATGGTGAGGATTAGTGGGTTTGT            | U  |
| M.ut.100    | TGATCTGTTTTGTGTACGGC                 | UA |
| M.ut.Z2     | TTTGGGTCCTTTCGTACAATAA               | U  |
| M.xxx.01    | AAAAGATAGAATCCAACCTAGCTCT            | UA |
| M.xxx.02    | AAACTAGGCAACAGAGATAGTCAAT            | UA |
| M.yyy.01    | AAATACCTATCGAGCCACTTGATAGC           | U  |
| M121        | TTGATATTTTTTCTTCATTAGACTATT          | U  |
| M132        | TCAACTCGAATAATAACCCTTAAAG            | U  |
| M161        | ATATCTCATTTTTTACTTCATCAAA            | U  |
| M212        | GTCTTTAAGGGACAACCAGC                 | UA |
| M221        | TAGCAGAAACTAATCGAACACC               | A  |
| M231        | AAAACCACTTCACCACAA                   | U  |
| M241        | TACCCTCAACCGCAAATAA                  | U  |

|           |                                |    |
|-----------|--------------------------------|----|
| UC.trn.04 | TGCTTGGAAGGCAAT                | U  |
| UP.co1.02 | CGGGGAAACGCTATATCAGGACA        | U  |
| UP.co1.03 | CTTTATTTGTATGATCTGTTTTGTGTACGG | U  |
| UP.co1.04 | CTACTAATCATAAGGATATTGG         | A  |
| UP.lrn.03 | TGCCTGTTTACCAAAAACATCG         | A  |
| UP.lrn.04 | CACGCTCACGCTAACG               | UA |
| UP.trn.01 | TTTGGTAAAGTTGCAGTTTACAGTAA     | U  |
| UT.srn.01 | TTATCGAATTAAGCCACAGG           | UA |
